# Supplementary material
Source: publisher site journal article supplement (https://www.dovepress.com/article/492630)
Supplement: Supplementary file 1 [file get_supplementary_file.php]

**Supplementary tables**

Supplementary Table 1. Detail information of selected SNPs for MR analysis in OSA and migraine.

| SNP | | |  | | Exposure (OSA) | | | | | | |  | | Outcome (Migraine) | | | |
| --- | --- | --- | --- | --- | --- | --- | --- | --- | --- | --- | --- | --- | --- | --- | --- | --- | --- |
| RS ID | EA | OA | |  | | F | Beta | Se | P-value | EAF |  | | Beta | | Se | P-value | EAF | |
| rs10507084 | T | C | |  | | 47.99536 | 0.1027 | 0.0189 | 5.51E-08 | 0.1653 |  | | 0.0190 | | 0.0154 | 2.17E-01 | 0.1781 | |
| rs10906985 | A | G | |  | | 33.74462 | 0.0660 | 0.0130 | 4.05E-07 | 0.3779 |  | | 0.0093 | | 0.0118 | 4.33E-01 | 0.4555 | |
| rs11075985 | A | C | |  | | 82.87861 | 0.1036 | 0.0130 | 1.99E-15 | 0.3721 |  | | -0.0025 | | 0.0119 | 8.36E-01 | 0.4268 | |
| rs114983649 | A | C | |  | | 31.8088 | 0.1542 | 0.0303 | 3.66E-07 | 0.0424 |  | | 0.0346 | | 0.0251 | 1.68E-01 | 0.0582 | |
| rs115903639 | A | G | |  | | 16.58522 | 0.1931 | 0.0423 | 4.87E-06 | 0.0137 |  | | -0.0357 | | 0.0306 | 2.43E-01 | 0.0389 | |
| rs116182122 | G | T | |  | | 39.54076 | 0.3093 | 0.0598 | 2.27E-07 | 0.0127 |  | | 0.0465 | | 0.0534 | 3.84E-01 | 0.0125 | |
| rs116420235 | T | C | |  | | 22.50672 | -0.2090 | 0.0444 | 2.51E-06 | 0.0159 |  | | -0.0080 | | 0.0342 | 8.15E-01 | 0.0317 | |
| rs11774552 | T | C | |  | | 35.03456 | -0.0662 | 0.0132 | 5.05E-07 | 0.4139 |  | | -0.0321 | | 0.0120 | 7.62E-03 | 0.4302 | |
| rs12699649 | T | C | |  | | 30.23136 | 0.0629 | 0.0134 | 2.90E-06 | 0.3656 |  | | 0.0205 | | 0.0123 | 9.52E-02 | 0.3780 | |
| rs142416325 | A | G | |  | | 47.7181 | -0.3465 | 0.0667 | 2.09E-07 | 0.0122 |  | | -0.0714 | | 0.0651 | 2.73E-01 | 0.0090 | |
| rs144160082 | G | A | |  | | 25.95862 | 0.1252 | 0.0271 | 4.00E-06 | 0.0531 |  | | -0.0132 | | 0.0227 | 5.61E-01 | 0.0738 | |
| rs145058358 | C | A | |  | | 43.10932 | 0.1578 | 0.0315 | 5.58E-07 | 0.0556 |  | | 0.0309 | | 0.0313 | 3.24E-01 | 0.0393 | |
| rs146794654 | T | C | |  | | 25.25257 | -0.2023 | 0.0425 | 1.90E-06 | 0.0191 |  | | 0.0601 | | 0.0392 | 1.25E-01 | 0.0231 | |
| rs16861404 | A | G | |  | | 29.01464 | 0.0791 | 0.0167 | 2.10E-06 | 0.1695 |  | | -0.0278 | | 0.0156 | 7.53E-02 | 0.1717 | |
| rs17547430 | G | A | |  | | 29.78071 | 0.1268 | 0.0255 | 6.36E-07 | 0.0598 |  | | 0.0075 | | 0.0251 | 7.63E-01 | 0.0599 | |
| rs181154734 | A | G | |  | | 30.24046 | 0.4060 | 0.0791 | 2.83E-07 | 0.0056 |  | | 0.0133 | | 0.0614 | 8.28E-01 | 0.0090 | |
| rs1885070 | G | A | |  | | 29.37048 | 0.0663 | 0.0144 | 4.32E-06 | 0.2828 |  | | -0.0171 | | 0.0131 | 1.94E-01 | 0.2807 | |
| rs1956376 | T | C | |  | | 38.5755 | 0.0690 | 0.0132 | 1.59E-07 | 0.4353 |  | | 0.0222 | | 0.0118 | 6.00E-02 | 0.4485 | |
| rs2277339 | G | T | |  | | 41.52853 | -0.1037 | 0.0197 | 1.49E-07 | 0.1355 |  | | -0.0008 | | 0.0176 | 9.65E-01 | 0.1302 | |
| rs2611742 | C | T | |  | | 31.79784 | 0.0629 | 0.0130 | 1.30E-06 | 0.4221 |  | | -0.0157 | | 0.0119 | 1.85E-01 | 0.5533 | |
| rs4488813 | G | A | |  | | 42.47262 | -0.1059 | 0.0231 | 4.50E-06 | 0.1324 |  | | 0.0167 | | 0.0213 | 4.33E-01 | 0.0844 | |
| rs58138946 | A | G | |  | | 39.75073 | 0.1695 | 0.0368 | 4.05E-06 | 0.0439 |  | | -0.0726 | | 0.0359 | 4.30E-02 | 0.0273 | |
| rs6815442 | T | A | |  | | 33.54016 | 0.0687 | 0.0146 | 2.53E-06 | 0.3147 |  | | 0.0079 | | 0.0139 | 5.72E-01 | 0.2370 | |
| rs7133573 | T | C | |  | | 30.37355 | -0.0613 | 0.0130 | 2.44E-06 | 0.5682 |  | | -0.0073 | | 0.0121 | 5.44E-01 | 0.5874 | |
| rs72683533 | A | G | |  | | 38.90483 | 0.1659 | 0.0363 | 4.75E-06 | 0.0449 |  | | -0.0113 | | 0.0401 | 7.79E-01 | 0.0232 | |
| rs73156514 | G | C | |  | | 29.27454 | 0.0919 | 0.0189 | 1.17E-06 | 0.1195 |  | | 0.0250 | | 0.0167 | 1.34E-01 | 0.1448 | |
| rs76054872 | T | G | |  | | 34.07697 | 0.2076 | 0.0445 | 3.10E-06 | 0.0246 |  | | 0.0194 | | 0.0416 | 6.41E-01 | 0.0208 | |
| rs79672111 | A | G | |  | | 33.11547 | 0.2391 | 0.0521 | 4.46E-06 | 0.0179 |  | | -0.0246 | | 0.0494 | 6.18E-01 | 0.0149 | |
| rs9318788 | G | A | |  | | 78.80665 | 1.4733 | 0.3002 | 9.21E-07 | 0.0011 |  | | 0.0335 | | 0.1650 | 8.39E-01 | 0.0014 | |

EA: Effect allele; OA: Other allele; EAF: Effect allele frequency; OSA: Obstructive sleep apnea.

Supplementary Table 2. Detail information of selected SNPs for MR analysis in OSA and MA.

| SNP | | |  | Exposure (OSA) | | | | |  | Outcome (MA) | | | | |
| --- | --- | --- | --- | --- | --- | --- | --- | --- | --- | --- | --- | --- | --- | --- |
| RS ID | EA | OA |  | F | Beta | Se | P-value | EAF |  | | Beta | Se | P-value | EAF | |
| rs10507084 | T | C |  | 47.99536 | 0.1027 | 0.0189 | 5.51E-08 | 0.1653 |  | | 0.0309 | 0.0229 | 1.77E-01 | 0.1779 | |
| rs10906985 | A | G |  | 33.74462 | 0.0660 | 0.0130 | 4.05E-07 | 0.3779 |  | | 0.0112 | 0.0177 | 5.26E-01 | 0.4555 | |
| rs11075985 | A | C |  | 82.87861 | 0.1036 | 0.0130 | 1.99E-15 | 0.3721 |  | | -0.0009 | 0.0178 | 9.61E-01 | 0.4269 | |
| rs114983649 | A | C |  | 31.8088 | 0.1542 | 0.0303 | 3.66E-07 | 0.0424 |  | | 0.0587 | 0.0375 | 1.18E-01 | 0.0582 | |
| rs115903639 | A | G |  | 16.58522 | 0.1931 | 0.0423 | 4.87E-06 | 0.0137 |  | | -0.0457 | 0.0454 | 3.14E-01 | 0.0389 | |
| rs116182122 | G | T |  | 39.54076 | 0.3093 | 0.0598 | 2.27E-07 | 0.0127 |  | | 0.0906 | 0.0801 | 2.58E-01 | 0.0125 | |
| rs116420235 | T | C |  | 22.50672 | -0.2090 | 0.0444 | 2.51E-06 | 0.0159 |  | | -0.0095 | 0.0510 | 8.51E-01 | 0.0317 | |
| rs11774552 | T | C |  | 35.03456 | -0.0662 | 0.0132 | 5.05E-07 | 0.4139 |  | | -0.0587 | 0.0180 | 1.10E-03 | 0.4305 | |
| rs12699649 | T | C |  | 30.23136 | 0.0629 | 0.0134 | 2.90E-06 | 0.3656 |  | | 0.0184 | 0.0183 | 3.15E-01 | 0.3778 | |
| rs142416325 | A | G |  | 47.7181 | -0.3465 | 0.0667 | 2.09E-07 | 0.0122 |  | | -0.1445 | 0.0979 | 1.40E-01 | 0.0091 | |
| rs144160082 | G | A |  | 25.95862 | 0.1252 | 0.0271 | 4.00E-06 | 0.0531 |  | | -0.0029 | 0.0340 | 9.32E-01 | 0.0738 | |
| rs145058358 | C | A |  | 43.10932 | 0.1578 | 0.0315 | 5.58E-07 | 0.0556 |  | | 0.0612 | 0.0470 | 1.93E-01 | 0.0393 | |
| rs146794654 | T | C |  | 25.25257 | -0.2023 | 0.0425 | 1.90E-06 | 0.0191 |  | | 0.0606 | 0.0585 | 3.00E-01 | 0.0230 | |
| rs16861404 | A | G |  | 29.01464 | 0.0791 | 0.0167 | 2.10E-06 | 0.1695 |  | | -0.0287 | 0.0233 | 2.19E-01 | 0.1718 | |
| rs17547430 | G | A |  | 29.78071 | 0.1268 | 0.0255 | 6.36E-07 | 0.0598 |  | | 0.0600 | 0.0375 | 1.10E-01 | 0.0600 | |
| rs181154734 | A | G |  | 30.24046 | 0.4060 | 0.0791 | 2.83E-07 | 0.0056 |  | | 0.1539 | 0.0913 | 9.20E-02 | 0.0090 | |
| rs1885070 | G | A |  | 29.37048 | 0.0663 | 0.0144 | 4.32E-06 | 0.2828 |  | | -0.0094 | 0.0196 | 6.32E-01 | 0.2807 | |
| rs1956376 | T | C |  | 38.5755 | 0.0690 | 0.0132 | 1.59E-07 | 0.4353 |  | | 0.0270 | 0.0177 | 1.27E-01 | 0.4482 | |
| rs2277339 | G | T |  | 41.52853 | -0.1037 | 0.0197 | 1.49E-07 | 0.1355 |  | | -0.0414 | 0.0263 | 1.15E-01 | 0.1300 | |
| rs2611742 | C | T |  | 31.79784 | 0.0629 | 0.0130 | 1.30E-06 | 0.4221 |  | | -0.0494 | 0.0177 | 5.18E-03 | 0.5532 | |
| rs4488813 | G | A |  | 42.47262 | -0.1059 | 0.0231 | 4.50E-06 | 0.1324 |  | | 0.0345 | 0.0317 | 2.77E-01 | 0.0844 | |
| rs58138946 | A | G |  | 39.75073 | 0.1695 | 0.0368 | 4.05E-06 | 0.0439 |  | | -0.0556 | 0.0535 | 2.99E-01 | 0.0274 | |
| rs6815442 | T | A |  | 33.54016 | 0.0687 | 0.0146 | 2.53E-06 | 0.3147 |  | | 0.0253 | 0.0208 | 2.22E-01 | 0.2370 | |
| rs7133573 | T | C |  | 30.37355 | -0.0613 | 0.0130 | 2.44E-06 | 0.5682 |  | | -0.0291 | 0.0180 | 1.06E-01 | 0.5871 | |
| rs72683533 | A | G |  | 38.90483 | 0.1659 | 0.0363 | 4.75E-06 | 0.0449 |  | | -0.0442 | 0.0602 | 4.63E-01 | 0.0233 | |
| rs73156514 | G | C |  | 29.27454 | 0.0919 | 0.0189 | 1.17E-06 | 0.1195 |  | | 0.0195 | 0.0249 | 4.35E-01 | 0.1446 | |
| rs76054872 | T | G |  | 34.07697 | 0.2076 | 0.0445 | 3.10E-06 | 0.0246 |  | | 0.0416 | 0.0624 | 5.05E-01 | 0.0208 | |
| rs79672111 | A | G |  | 33.11547 | 0.2391 | 0.0521 | 4.46E-06 | 0.0179 |  | | -0.0398 | 0.0739 | 5.91E-01 | 0.0149 | |
| rs9318788 | G | A |  | 78.80665 | 1.4733 | 0.3002 | 9.21E-07 | 0.0011 |  | | 0.3836 | 0.2519 | 1.28E-01 | 0.0014 | |

EA: Effect allele; OA: Other allele; EAF: Effect allele frequency; OSA: Obstructive sleep apnea; MA: Migraine with aura

Supplementary Table 3. Detail information of selected SNPs for MR analysis in OSA and MoA.

| SNP | | |  | Exposure (OSA) | | | | |  | Outcome (MoA) | | | | |
| --- | --- | --- | --- | --- | --- | --- | --- | --- | --- | --- | --- | --- | --- | --- |
| RS ID | EA | OA |  | F | Beta | Se | P-value | EAF |  | Beta | Se | P-value | EAF |
| rs10507084 | T | C |  | 47.99536 | 0.1027 | 0.0189 | 5.51E-08 | 0.1653 |  | 0.0309 | 0.0229 | 1.77E-01 | 0.1779 |
| rs10906985 | A | G |  | 33.74462 | 0.0660 | 0.0130 | 4.05E-07 | 0.3779 |  | 0.0112 | 0.0177 | 5.26E-01 | 0.4555 |
| rs11075985 | A | C |  | 82.87861 | 0.1036 | 0.0130 | 1.99E-15 | 0.3721 |  | -0.0009 | 0.0178 | 9.61E-01 | 0.4269 |
| rs114983649 | A | C |  | 31.8088 | 0.1542 | 0.0303 | 3.66E-07 | 0.0424 |  | 0.0587 | 0.0375 | 1.18E-01 | 0.0582 |
| rs115903639 | A | G |  | 16.58522 | 0.1931 | 0.0423 | 4.87E-06 | 0.0137 |  | -0.0457 | 0.0454 | 3.14E-01 | 0.0389 |
| rs116182122 | G | T |  | 39.54076 | 0.3093 | 0.0598 | 2.27E-07 | 0.0127 |  | 0.0906 | 0.0801 | 2.58E-01 | 0.0125 |
| rs116420235 | T | C |  | 22.50672 | -0.2090 | 0.0444 | 2.51E-06 | 0.0159 |  | -0.0095 | 0.0510 | 8.51E-01 | 0.0317 |
| rs11774552 | T | C |  | 35.03456 | -0.0662 | 0.0132 | 5.05E-07 | 0.4139 |  | -0.0587 | 0.0180 | 1.10E-03 | 0.4305 |
| rs12699649 | T | C |  | 30.23136 | 0.0629 | 0.0134 | 2.90E-06 | 0.3656 |  | 0.0184 | 0.0183 | 3.15E-01 | 0.3778 |
| rs142416325 | A | G |  | 47.7181 | -0.3465 | 0.0667 | 2.09E-07 | 0.0122 |  | -0.1445 | 0.0979 | 1.40E-01 | 0.0091 |
| rs144160082 | G | A |  | 25.95862 | 0.1252 | 0.0271 | 4.00E-06 | 0.0531 |  | -0.0029 | 0.0340 | 9.32E-01 | 0.0738 |
| rs145058358 | C | A |  | 43.10932 | 0.1578 | 0.0315 | 5.58E-07 | 0.0556 |  | 0.0612 | 0.0470 | 1.93E-01 | 0.0393 |
| rs146794654 | T | C |  | 25.25257 | -0.2023 | 0.0425 | 1.90E-06 | 0.0191 |  | 0.0606 | 0.0585 | 3.00E-01 | 0.0230 |
| rs16861404 | A | G |  | 29.01464 | 0.0791 | 0.0167 | 2.10E-06 | 0.1695 |  | -0.0287 | 0.0233 | 2.19E-01 | 0.1718 |
| rs17547430 | G | A |  | 29.78071 | 0.1268 | 0.0255 | 6.36E-07 | 0.0598 |  | 0.0600 | 0.0375 | 1.10E-01 | 0.0600 |
| rs181154734 | A | G |  | 30.24046 | 0.4060 | 0.0791 | 2.83E-07 | 0.0056 |  | 0.1539 | 0.0913 | 9.20E-02 | 0.0090 |
| rs1885070 | G | A |  | 29.37048 | 0.0663 | 0.0144 | 4.32E-06 | 0.2828 |  | -0.0094 | 0.0196 | 6.32E-01 | 0.2807 |
| rs1956376 | T | C |  | 38.5755 | 0.0690 | 0.0132 | 1.59E-07 | 0.4353 |  | 0.0270 | 0.0177 | 1.27E-01 | 0.4482 |
| rs2277339 | G | T |  | 41.52853 | -0.1037 | 0.0197 | 1.49E-07 | 0.1355 |  | -0.0414 | 0.0263 | 1.15E-01 | 0.1300 |
| rs2611742 | C | T |  | 31.79784 | 0.0629 | 0.0130 | 1.30E-06 | 0.4221 |  | -0.0494 | 0.0177 | 5.18E-03 | 0.5532 |
| rs4488813 | G | A |  | 42.47262 | -0.1059 | 0.0231 | 4.50E-06 | 0.1324 |  | 0.0345 | 0.0317 | 2.77E-01 | 0.0844 |
| rs58138946 | A | G |  | 39.75073 | 0.1695 | 0.0368 | 4.05E-06 | 0.0439 |  | -0.0556 | 0.0535 | 2.99E-01 | 0.0274 |
| rs6815442 | T | A |  | 33.54016 | 0.0687 | 0.0146 | 2.53E-06 | 0.3147 |  | 0.0253 | 0.0208 | 2.22E-01 | 0.2370 |
| rs7133573 | T | C |  | 30.37355 | -0.0613 | 0.0130 | 2.44E-06 | 0.5682 |  | -0.0291 | 0.0180 | 1.06E-01 | 0.5871 |
| rs72683533 | A | G |  | 38.90483 | 0.1659 | 0.0363 | 4.75E-06 | 0.0449 |  | -0.0442 | 0.0602 | 4.63E-01 | 0.0233 |
| rs73156514 | G | C |  | 29.27454 | 0.0919 | 0.0189 | 1.17E-06 | 0.1195 |  | 0.0195 | 0.0249 | 4.35E-01 | 0.1446 |
| rs76054872 | T | G |  | 34.07697 | 0.2076 | 0.0445 | 3.10E-06 | 0.0246 |  | 0.0416 | 0.0624 | 5.05E-01 | 0.0208 |
| rs79672111 | A | G |  | 33.11547 | 0.2391 | 0.0521 | 4.46E-06 | 0.0179 |  | -0.0398 | 0.0739 | 5.91E-01 | 0.0149 |
| rs9318788 | G | A |  | 78.80665 | 1.4733 | 0.3002 | 9.21E-07 | 0.0011 |  | 0.3836 | 0.2519 | 1.28E-01 | 0.0014 |

EA: Effect allele; OA: Other allele; EAF: Effect allele frequency; OSA: Obstructive sleep apnea; MoA: Migraine without aura.

Supplementary Table 4. Detail information of selected SNPs for MR analysis in migraine and OSA

| SNP | | |  | Exposure (Migraine) | | | | |  | Outcome (OSA) | | | |
| --- | --- | --- | --- | --- | --- | --- | --- | --- | --- | --- | --- | --- | --- |
| RS ID | EA | OA |  | F | Beta | Se | P-value | EAF |  | Beta | Se | P-value | EAF |
| rs113567824 | T | C |  | 15.56914 | -0.2543 | 0.0555 | 4.69E-06 | 0.0139 |  | 0.0108 | 0.0480 | 8.21E-01 | 0.0254 |
| rs12811859 | T | G |  | 16.92836 | -0.2505 | 0.0502 | 5.94E-07 | 0.0156 |  | -0.0895 | 0.0511 | 7.99E-02 | 0.0207 |
| rs142115564 | A | T |  | 13.97351 | -0.1389 | 0.0302 | 4.12E-06 | 0.0431 |  | -0.0005 | 0.0351 | 9.89E-01 | 0.0299 |
| rs144208700 | T | C |  | 14.42593 | -0.1475 | 0.0319 | 3.69E-06 | 0.0393 |  | 0.0300 | 0.0347 | 3.86E-01 | 0.0346 |
| rs144646256 | G | A |  | 14.9732 | -0.2327 | 0.0492 | 2.20E-06 | 0.0160 |  | -0.0259 | 0.0493 | 5.99E-01 | 0.0198 |
| rs146463602 | G | T |  | 11.95163 | 0.1921 | 0.0408 | 2.56E-06 | 0.0188 |  | 0.0083 | 0.0557 | 8.81E-01 | 0.0114 |
| rs17548604 | T | G |  | 13.46123 | -0.0803 | 0.0174 | 3.73E-06 | 0.1379 |  | -0.0433 | 0.0190 | 2.30E-02 | 0.1115 |
| rs17678460 | A | G |  | 14.36911 | -0.0711 | 0.0150 | 1.98E-06 | 0.2031 |  | -0.0020 | 0.0159 | 9.02E-01 | 0.1697 |
| rs2183947 | A | G |  | 14.07551 | -0.0671 | 0.0141 | 1.90E-06 | 0.2317 |  | -0.0436 | 0.0154 | 4.59E-03 | 0.1998 |
| rs2738814 | A | C |  | 16.33443 | -0.0634 | 0.0122 | 2.03E-07 | 0.6366 |  | 0.0051 | 0.0134 | 7.05E-01 | 0.6234 |
| rs28667298 | G | T |  | 13.48693 | 0.0662 | 0.0139 | 1.98E-06 | 0.2266 |  | 0.0270 | 0.0240 | 2.62E-01 | 0.1834 |
| rs36010570 | C | G |  | 13.06008 | 0.1462 | 0.0307 | 1.87E-06 | 0.0361 |  | 0.0177 | 0.0317 | 5.77E-01 | 0.0465 |
| rs4683465 | C | T |  | 17.63914 | 0.0677 | 0.0125 | 5.89E-08 | 0.3241 |  | 0.0059 | 0.0136 | 6.65E-01 | 0.3673 |
| rs56221187 | C | G |  | 13.8457 | 0.1705 | 0.0346 | 8.38E-07 | 0.0279 |  | 0.0896 | 0.0346 | 9.70E-03 | 0.0471 |
| rs71416856 | T | C |  | 15.11376 | -0.0785 | 0.0159 | 8.58E-07 | 0.1678 |  | -0.0581 | 0.0186 | 1.82E-03 | 0.0935 |
| rs7398375 | G | C |  | 21.37044 | 0.0741 | 0.0126 | 3.91E-09 | 0.3310 |  | 0.0142 | 0.0142 | 3.16E-01 | 0.3680 |
| rs74522625 | G | A |  | 15.04936 | -0.1142 | 0.0236 | 1.25E-06 | 0.0707 |  | -0.0040 | 0.0278 | 8.85E-01 | 0.0532 |
| rs75470495 | T | C |  | 12.16365 | 0.1467 | 0.0316 | 3.54E-06 | 0.0333 |  | 0.0092 | 0.0426 | 8.30E-01 | 0.0178 |
| rs75537311 | A | G |  | 17.74693 | -0.2931 | 0.0623 | 2.54E-06 | 0.0119 |  | 0.0520 | 0.0425 | 2.21E-01 | 0.0371 |
| rs76710367 | T | C |  | 11.33088 | 0.5192 | 0.1129 | 4.26E-06 | 0.0024 |  | 0.0833 | 0.0711 | 2.41E-01 | 0.0148 |
| rs76968534 | C | G |  | 15.61585 | -0.1446 | 0.0294 | 8.69E-07 | 0.0445 |  | 0.0075 | 0.0343 | 8.26E-01 | 0.0318 |
| rs77106170 | C | T |  | 13.75838 | -0.1092 | 0.0237 | 4.24E-06 | 0.0707 |  | 0.0425 | 0.0249 | 8.82E-02 | 0.0862 |
| rs77400760 | T | G |  | 11.66867 | 0.2792 | 0.0595 | 2.74E-06 | 0.0086 |  | 0.0929 | 0.0711 | 1.91E-01 | 0.0089 |
| rs78853734 | G | C |  | 15.19899 | -0.2091 | 0.0448 | 3.13E-06 | 0.0202 |  | 0.0285 | 0.0479 | 5.52E-01 | 0.0202 |
| rs8003921 | C | T |  | 15.03964 | 0.0612 | 0.0128 | 1.60E-06 | 0.6462 |  | -0.0043 | 0.0183 | 8.14E-01 | 0.6477 |
| rs8073061 | G | A |  | 13.52736 | 0.1836 | 0.0381 | 1.40E-06 | 0.0234 |  | 0.0411 | 0.0417 | 3.25E-01 | 0.0274 |
| rs921038 | C | T |  | 15.50829 | -0.0607 | 0.0120 | 4.40E-07 | 0.6018 |  | -0.0245 | 0.0133 | 6.48E-02 | 0.5651 |
| rs9266329 | A | G |  | 18.58282 | -0.0747 | 0.0136 | 4.22E-08 | 0.2541 |  | -0.0036 | 0.0155 | 8.14E-01 | 0.2715 |
| rs9349379 | G | A |  | 28.37934 | -0.0807 | 0.0119 | 1.04E-11 | 0.4524 |  | -0.0132 | 0.0130 | 3.10E-01 | 0.4810 |
| rs9568980 | A | T |  | 12.83684 | 0.0817 | 0.0175 | 2.98E-06 | 0.1252 |  | 0.0207 | 0.0188 | 2.73E-01 | 0.1589 |
| rs9611746 | G | A |  | 13.49854 | -0.0822 | 0.0178 | 3.84E-06 | 0.1309 |  | -0.0119 | 0.0171 | 4.86E-01 | 0.2400 |
| rs9653353 | T | C |  | 13.82911 | -0.0570 | 0.0120 | 1.96E-06 | 0.5873 |  | -0.0031 | 0.0132 | 8.17E-01 | 0.5244 |

EA: Effect allele; OA: Other allele; EAF: Effect allele frequency; OSA: Obstructive sleep apnea.

Supplementary Table 5. Detail information of selected SNPs for MR analysis in MA and OSA.

| SNP | | |  | Exposure (MA) | | | | |  | Outcome (OSA) | | | |
| --- | --- | --- | --- | --- | --- | --- | --- | --- | --- | --- | --- | --- | --- |
| RS ID | EA | OA |  | F | Beta | Se | P-value | EAF |  | Beta | Se | P-value | EAF |
| rs114572408 | T | C |  | 126.123 | -1.9861 | 0.4319 | 4.26E-06 | 0.0014 |  | -0.0146 | 0.0844 | 8.62E-01 | 0.0104 |
| rs11712982 | T | C |  | 36.04067 | 0.1091 | 0.0235 | 3.44E-06 | 0.1586 |  | 0.0122 | 0.0180 | 4.98E-01 | 0.1599 |
| rs117208805 | A | T |  | 47.2309 | -0.1798 | 0.0367 | 9.53E-07 | 0.0691 |  | 0.0550 | 0.0289 | 5.74E-02 | 0.0467 |
| rs117750534 | T | A |  | 65.32393 | -0.3271 | 0.0598 | 4.58E-08 | 0.0276 |  | -0.0470 | 0.0457 | 3.04E-01 | 0.0162 |
| rs12529313 | G | A |  | 39.52159 | -0.1022 | 0.0220 | 3.22E-06 | 0.2114 |  | 0.0106 | 0.0166 | 5.23E-01 | 0.1572 |
| rs12653486 | T | A |  | 40.49569 | 1.8894 | 0.4055 | 3.17E-06 | 0.0005 |  | 2.2819 | 0.7427 | 2.12E-03 | 0.0003 |
| rs16035 | G | T |  | 51.36917 | -0.0951 | 0.0176 | 6.64E-08 | 0.5036 |  | -0.0105 | 0.0131 | 4.23E-01 | 0.6472 |
| rs17564412 | A | G |  | 39.27416 | -0.1271 | 0.0277 | 4.54E-06 | 0.1220 |  | -0.0348 | 0.0197 | 7.81E-02 | 0.1345 |
| rs1822266 | T | C |  | 35.26183 | -0.1494 | 0.0324 | 3.91E-06 | 0.9247 |  | 0.0114 | 0.0228 | 6.16E-01 | 0.8837 |
| rs2293631 | A | C |  | 62.246 | -0.1477 | 0.0256 | 7.83E-09 | 0.1471 |  | 0.0396 | 0.0177 | 2.55E-02 | 0.2183 |
| rs2303400 | C | T |  | 42.56026 | 0.0867 | 0.0177 | 9.63E-07 | 0.5247 |  | 0.0123 | 0.0131 | 3.45E-01 | 0.4976 |
| rs2517653 | A | G |  | 52.65859 | -0.1014 | 0.0187 | 5.83E-08 | 0.3431 |  | -0.0012 | 0.0144 | 9.32E-01 | 0.2514 |
| rs34353835 | T | C |  | 42.53982 | -0.1664 | 0.0353 | 2.45E-06 | 0.0730 |  | -0.0062 | 0.0272 | 8.18E-01 | 0.0545 |
| rs35069141 | A | G |  | 35.39803 | 0.1067 | 0.0232 | 4.20E-06 | 0.1639 |  | 0.0291 | 0.0171 | 9.00E-02 | 0.1468 |
| rs353869 | T | C |  | 38.18196 | 0.0867 | 0.0185 | 2.88E-06 | 0.3382 |  | -0.0031 | 0.0138 | 8.22E-01 | 0.3362 |
| rs3845979 | G | A |  | 38.91494 | 0.0829 | 0.0176 | 2.56E-06 | 0.4775 |  | 0.0103 | 0.0130 | 4.29E-01 | 0.4351 |
| rs4362053 | G | A |  | 37.80731 | 0.0931 | 0.0203 | 4.59E-06 | 0.7404 |  | 0.0100 | 0.0153 | 5.13E-01 | 0.7716 |
| rs4683465 | C | T |  | 42.62492 | 0.0926 | 0.0186 | 6.23E-07 | 0.3238 |  | 0.0059 | 0.0136 | 6.65E-01 | 0.3673 |
| rs4998284 | G | A |  | 33.54366 | 0.3638 | 0.0782 | 3.25E-06 | 0.0113 |  | -0.0338 | 0.0475 | 4.77E-01 | 0.0673 |
| rs7135461 | A | C |  | 36.92528 | 0.0809 | 0.0177 | 4.72E-06 | 0.5370 |  | 0.0246 | 0.0129 | 5.69E-02 | 0.4064 |
| rs73166594 | C | A |  | 37.15214 | 0.1589 | 0.0333 | 1.78E-06 | 0.0697 |  | 0.0134 | 0.0234 | 5.68E-01 | 0.0882 |
| rs73328777 | A | G |  | 33.07069 | 0.3205 | 0.0679 | 2.34E-06 | 0.0144 |  | 0.0834 | 0.0482 | 8.35E-02 | 0.0240 |
| rs79003543 | C | G |  | 36.79187 | 0.1661 | 0.0354 | 2.62E-06 | 0.0627 |  | -0.0034 | 0.0285 | 9.05E-01 | 0.0519 |
| rs8002734 | A | T |  | 42.59536 | 0.1031 | 0.0209 | 8.18E-07 | 0.2289 |  | 0.0169 | 0.0157 | 2.83E-01 | 0.2504 |

EA: Effect allele; OA: Other allele; EAF: Effect allele frequency; MA: Migraine with aura; OSA: Obstructive sleep apnea.

Supplementary Table 6. Detail information of selected SNPs for MR analysis in MoA and OSA.

| SNP | | |  | Exposure (MoA) | | | | | |  | | Outcome (OSA) | | | | |
| --- | --- | --- | --- | --- | --- | --- | --- | --- | --- | --- | --- | --- | --- | --- | --- | --- |
| RS ID | EA | OA |  | F | Beta | Se | P-value | EAF |  | | Beta | | Se | P-value | EAF |
| rs10774231 | C | T |  | 92.1768 | -0.1047 | 0.0191 | 4.24E-08 | 0.5510 |  | | -0.0267 | | 0.0130 | 3.93E-02 | 0.5234 |
| rs11153082 | G | A |  | 85.7549 | 0.1098 | 0.0205 | 8.19E-08 | 0.2984 |  | | 0.0292 | | 0.0138 | 3.50E-02 | 0.3485 |
| rs112019670 | A | G |  | 51.4636 | 0.6332 | 0.1276 | 6.95E-07 | 0.0038 |  | | 0.0226 | | 0.0703 | 7.48E-01 | 0.0154 |
| rs114940828 | C | A |  | 79.1791 | -0.2464 | 0.0523 | 2.46E-06 | 0.0400 |  | | 0.0079 | | 0.0324 | 8.08E-01 | 0.0451 |
| rs117872033 | T | C |  | 59.882 | 0.2833 | 0.0603 | 2.61E-06 | 0.0225 |  | | 0.0003 | | 0.0384 | 9.94E-01 | 0.0375 |
| rs117992237 | T | A |  | 81.9254 | -0.3704 | 0.0810 | 4.83E-06 | 0.0179 |  | | -0.0749 | | 0.0539 | 1.65E-01 | 0.0131 |
| rs12578533 | G | C |  | 66.1113 | 0.1141 | 0.0240 | 2.05E-06 | 0.1832 |  | | -0.0013 | | 0.0164 | 9.36E-01 | 0.2240 |
| rs12761264 | C | T |  | 67.959 | 0.1400 | 0.0289 | 1.28E-06 | 0.1155 |  | | 0.0028 | | 0.0189 | 8.81E-01 | 0.2046 |
| rs1407894 | G | A |  | 129.332 | 0.8408 | 0.1725 | 1.09E-06 | 0.9946 |  | | -0.0583 | | 0.0585 | 3.19E-01 | 0.9800 |
| rs1458265 | A | T |  | 61.4584 | 0.2082 | 0.0443 | 2.54E-06 | 0.0437 |  | | -0.0204 | | 0.0298 | 4.93E-01 | 0.0712 |
| rs72802542 | G | A |  | 65.4309 | 0.1444 | 0.0305 | 2.14E-06 | 0.1031 |  | | 0.0217 | | 0.0204 | 2.89E-01 | 0.1334 |
| rs7398375 | G | C |  | 84.476 | 0.1060 | 0.0203 | 1.66E-07 | 0.3306 |  | | 0.0142 | | 0.0142 | 3.16E-01 | 0.3680 |
| rs76462598 | T | A |  | 89.8305 | -0.2337 | 0.0464 | 4.74E-07 | 0.0510 |  | | -0.0592 | | 0.0291 | 4.17E-02 | 0.0462 |
| rs77276355 | A | G |  | 85.4554 | 0.1304 | 0.0241 | 6.50E-08 | 0.1805 |  | | 0.0360 | | 0.0176 | 4.10E-02 | 0.1242 |
| rs9349379 | G | A |  | 88.2943 | -0.1024 | 0.0192 | 9.58E-08 | 0.4531 |  | | -0.0132 | | 0.0130 | 3.10E-01 | 0.4810 |
| rs9611746 | G | A |  | 78.3355 | -0.1423 | 0.0292 | 1.07E-06 | 0.1311 |  | | -0.0119 | | 0.0171 | 4.86E-01 | 0.2400 |

EA: Effect allele; OA: Other allele; EAF: Effect allele frequency; MoA: Migraine without aura; OSA: Obstructive sleep apnea.

**Supplementary figures**


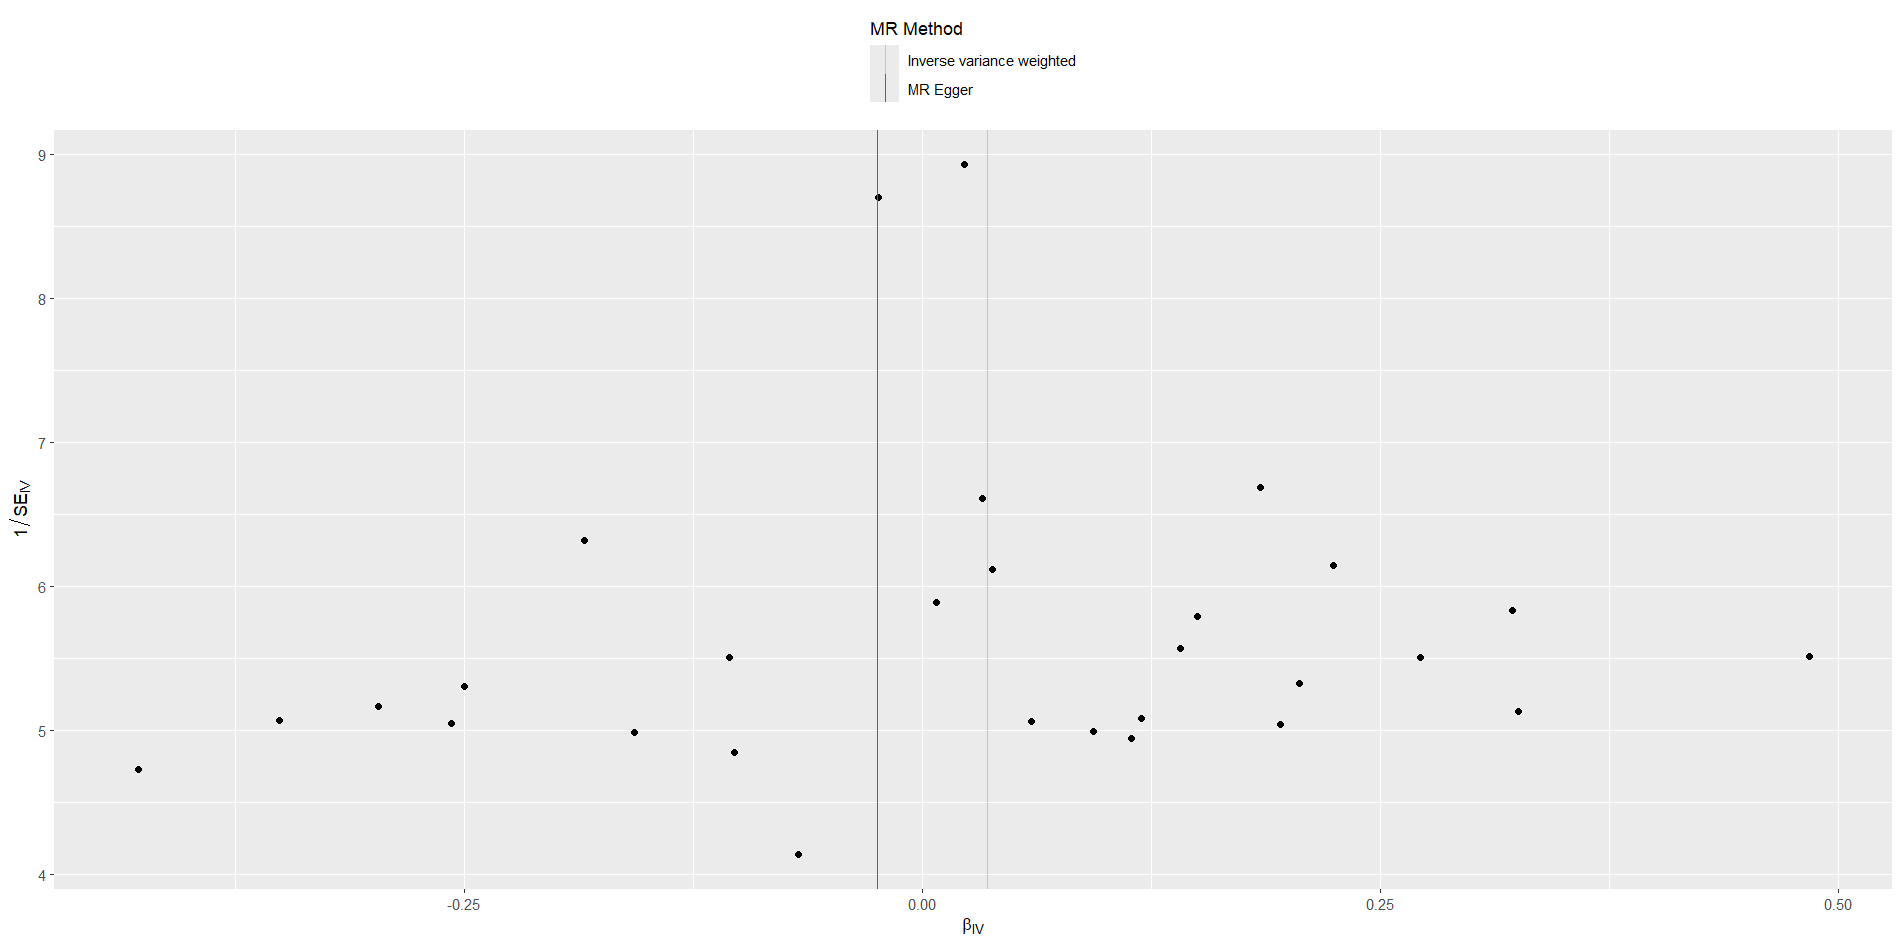


Supplementary Figure 1. The funnel plot of the heterogeneity of obstructive sleep apnea on migraine.


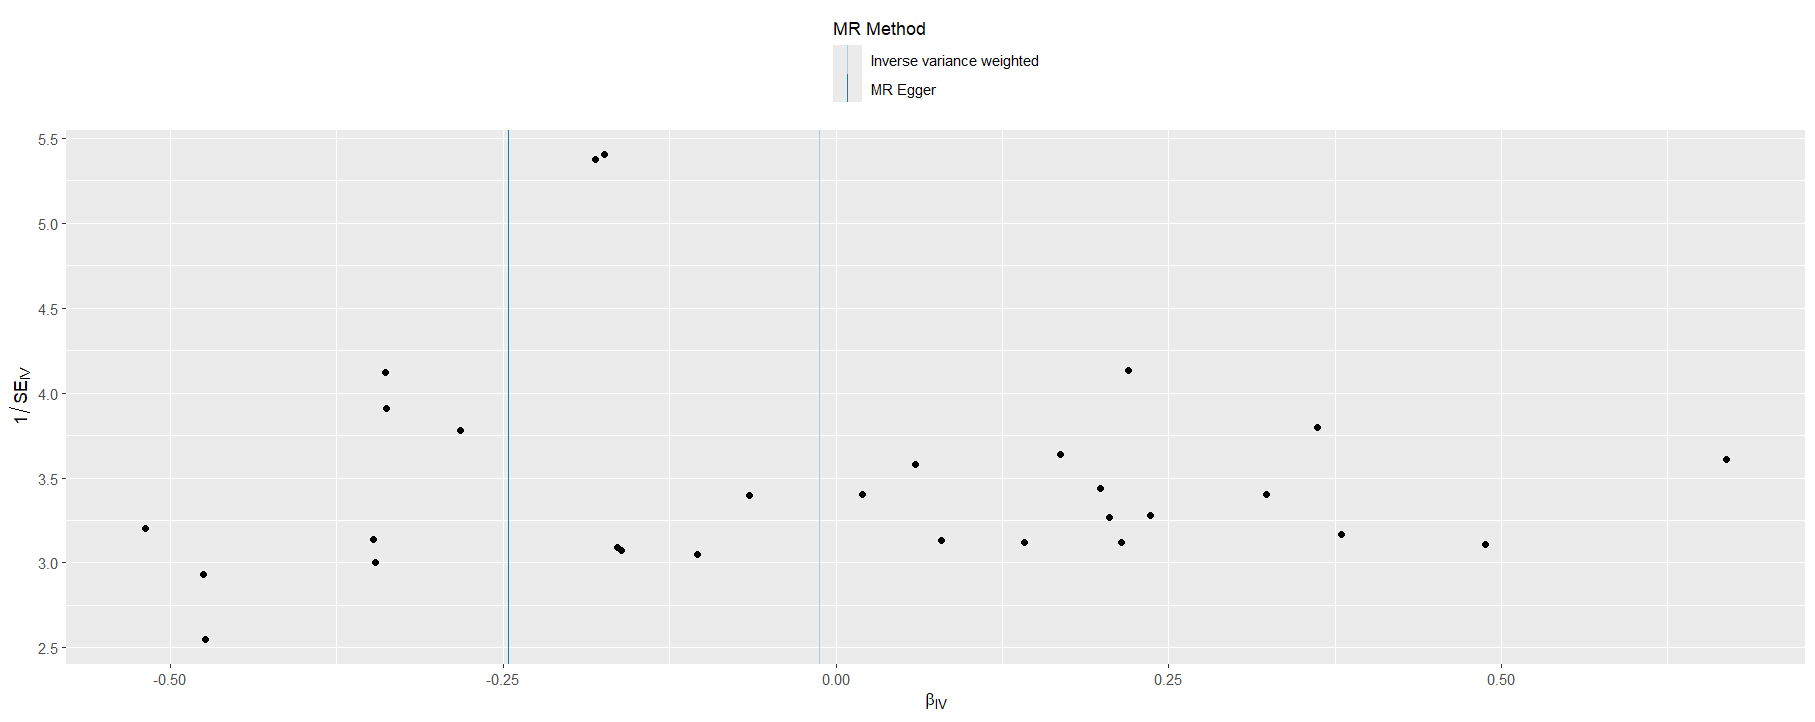


Supplementary Figure 2. The funnel plot of the heterogeneity of obstructive sleep apnea on migraine with aura.


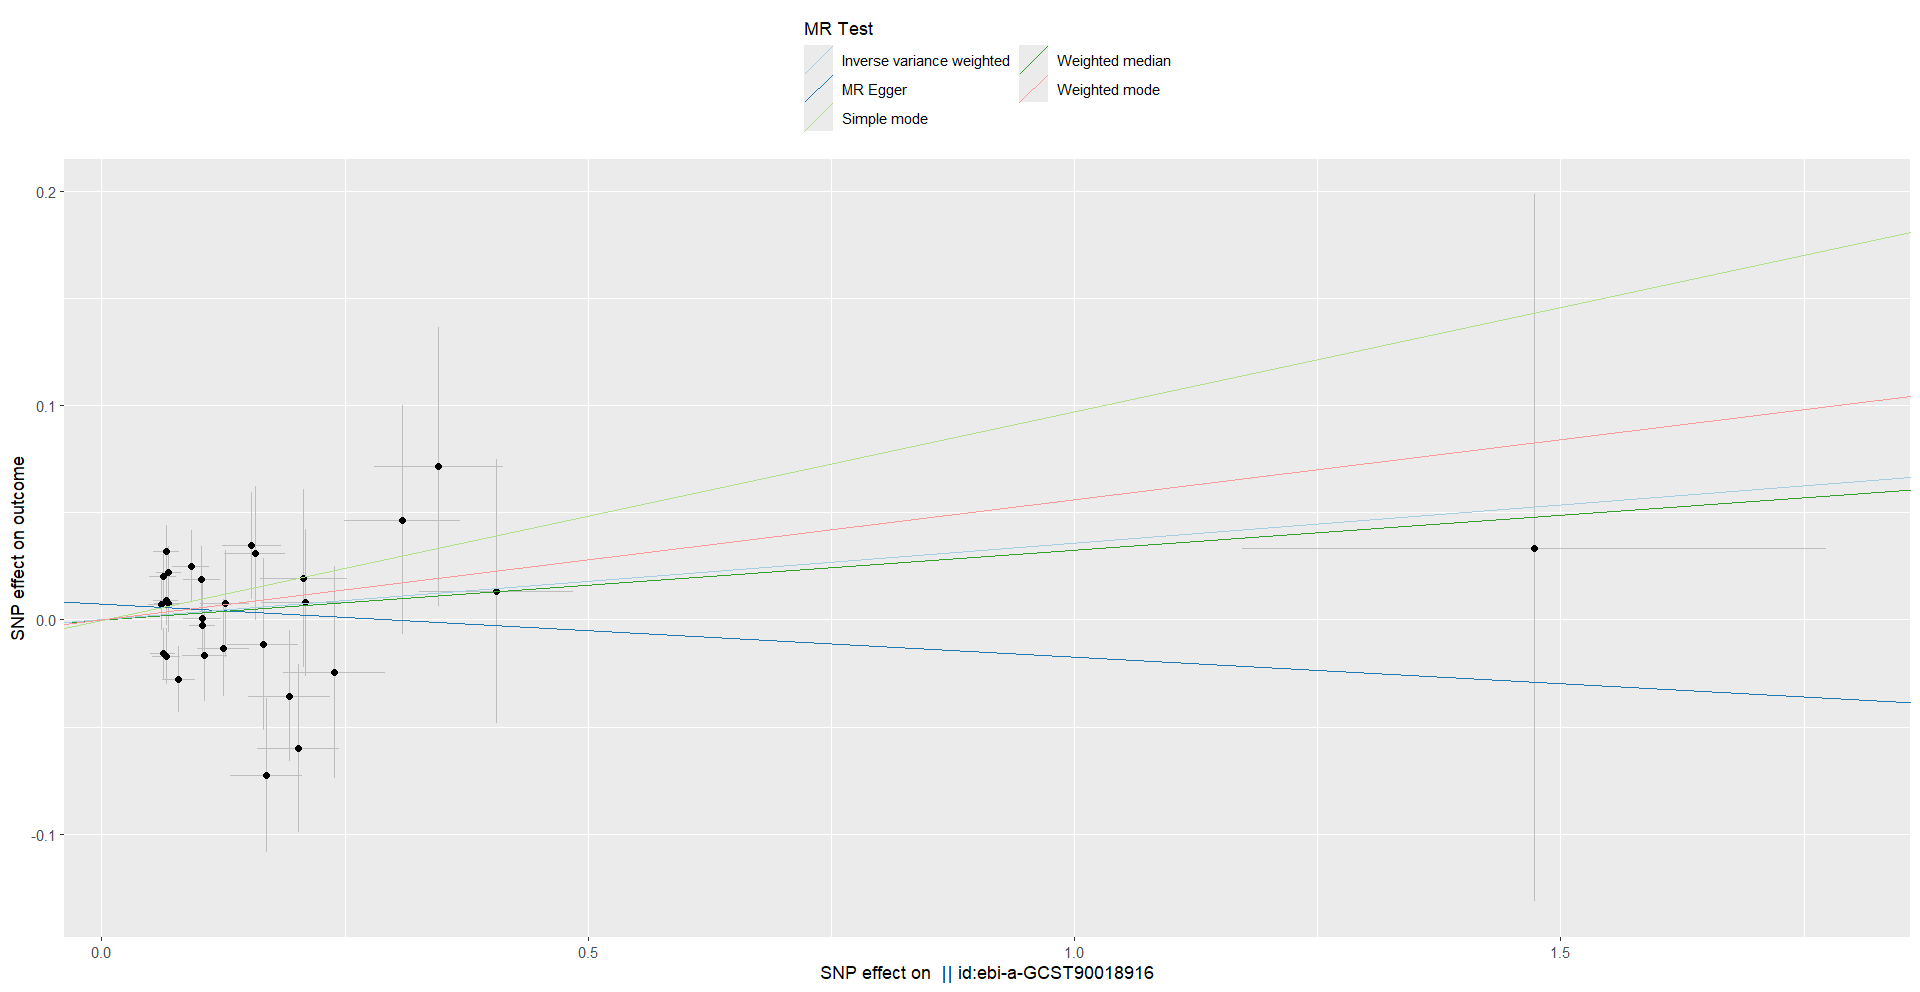


Supplementary Figure 3. The scatter plot of the causal effect of obstructive sleep apnea on migraine.


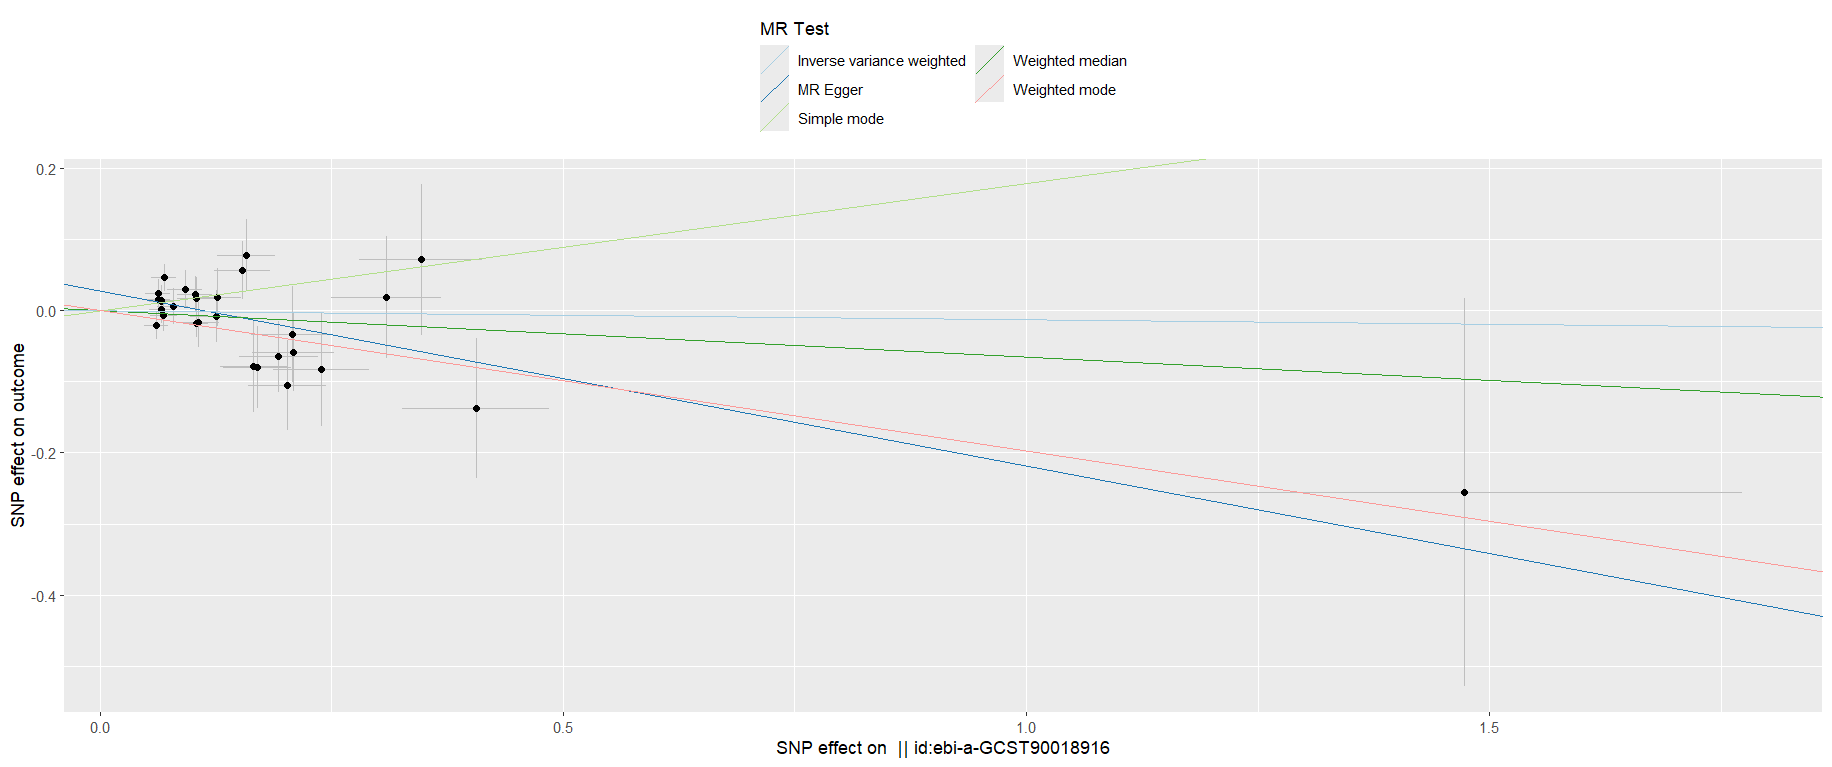


Supplementary Figure 4. The scatter plot of the causal effect of obstructive sleep apnea on migraine without aura.


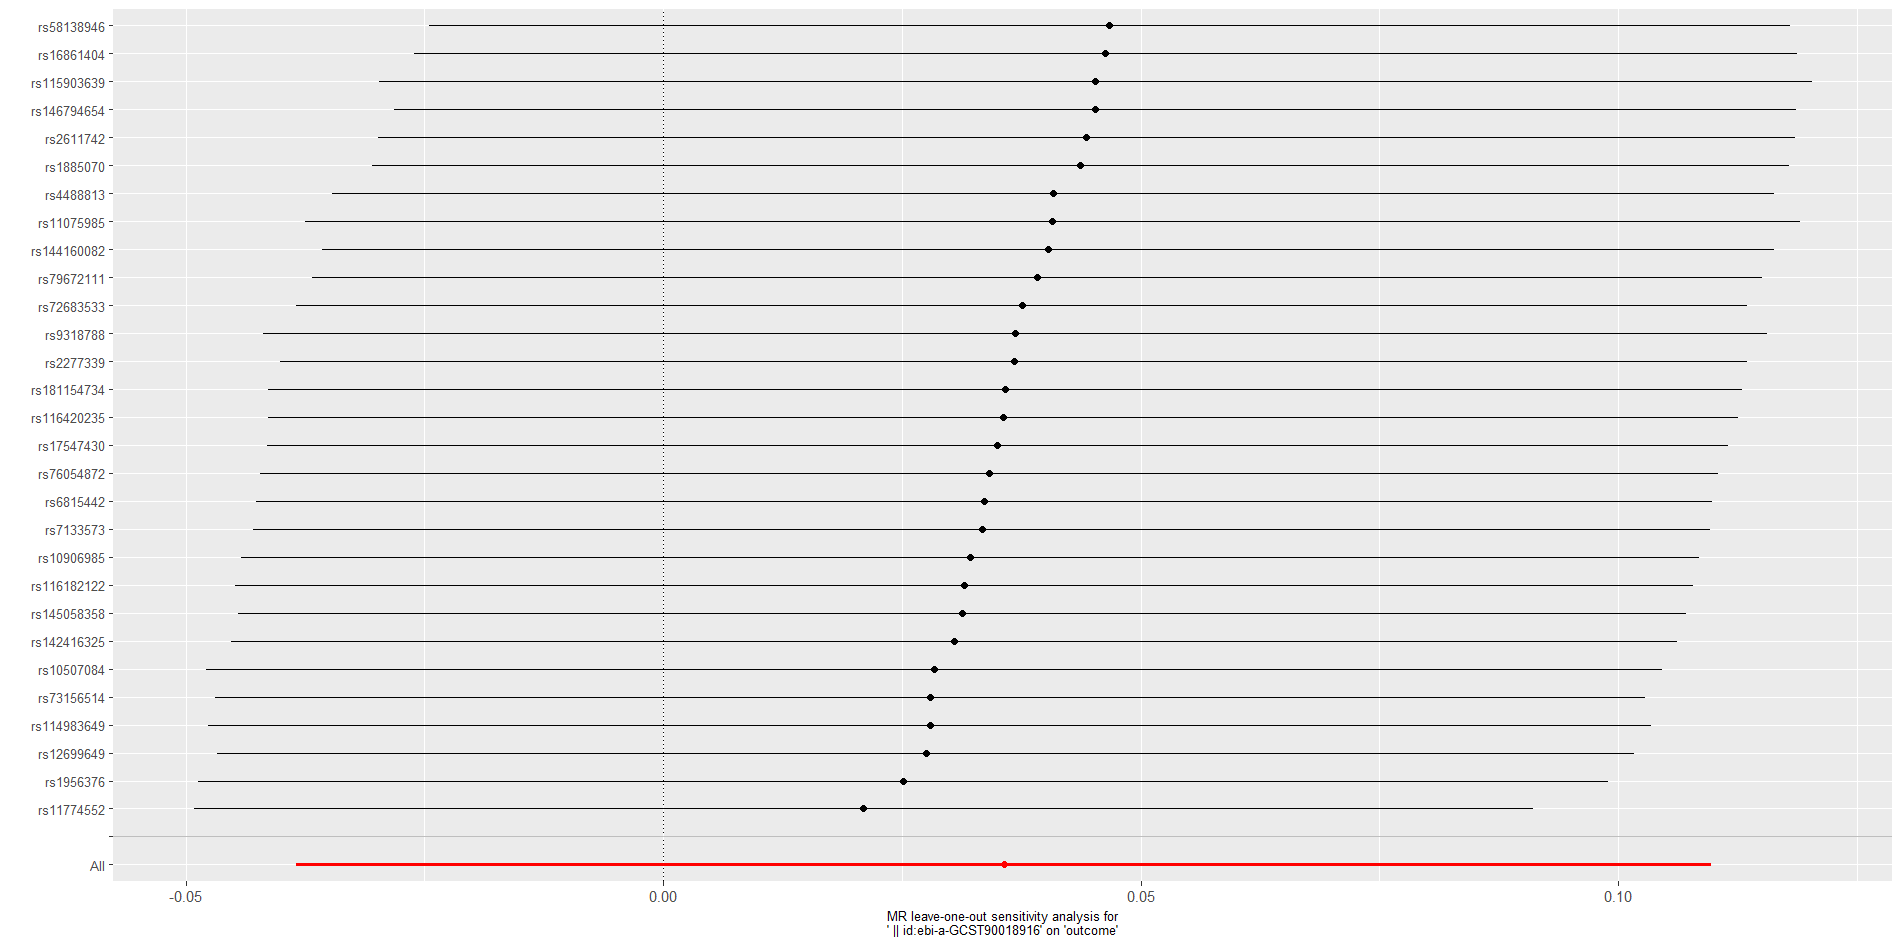


Supplementary Figure 5. The forest plot of the “leave-one-out” sensitivity analysis of the result of obstructive sleep apnea on migraine.


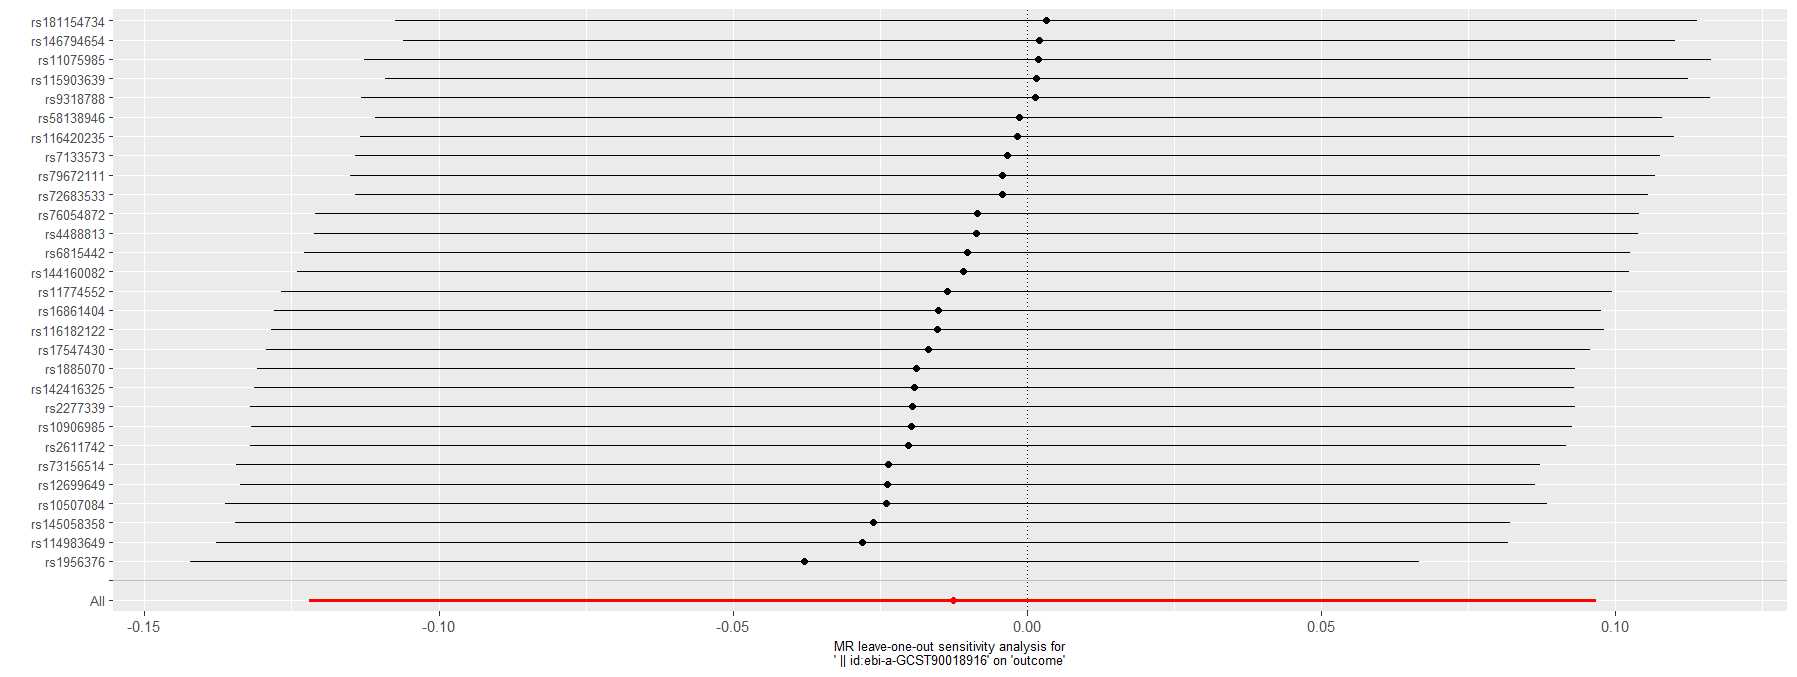


Supplementary Figure 6. The forest plot of the “leave-one-out” sensitivity analysis of the result of obstructive sleep apnea on migraine without aura.


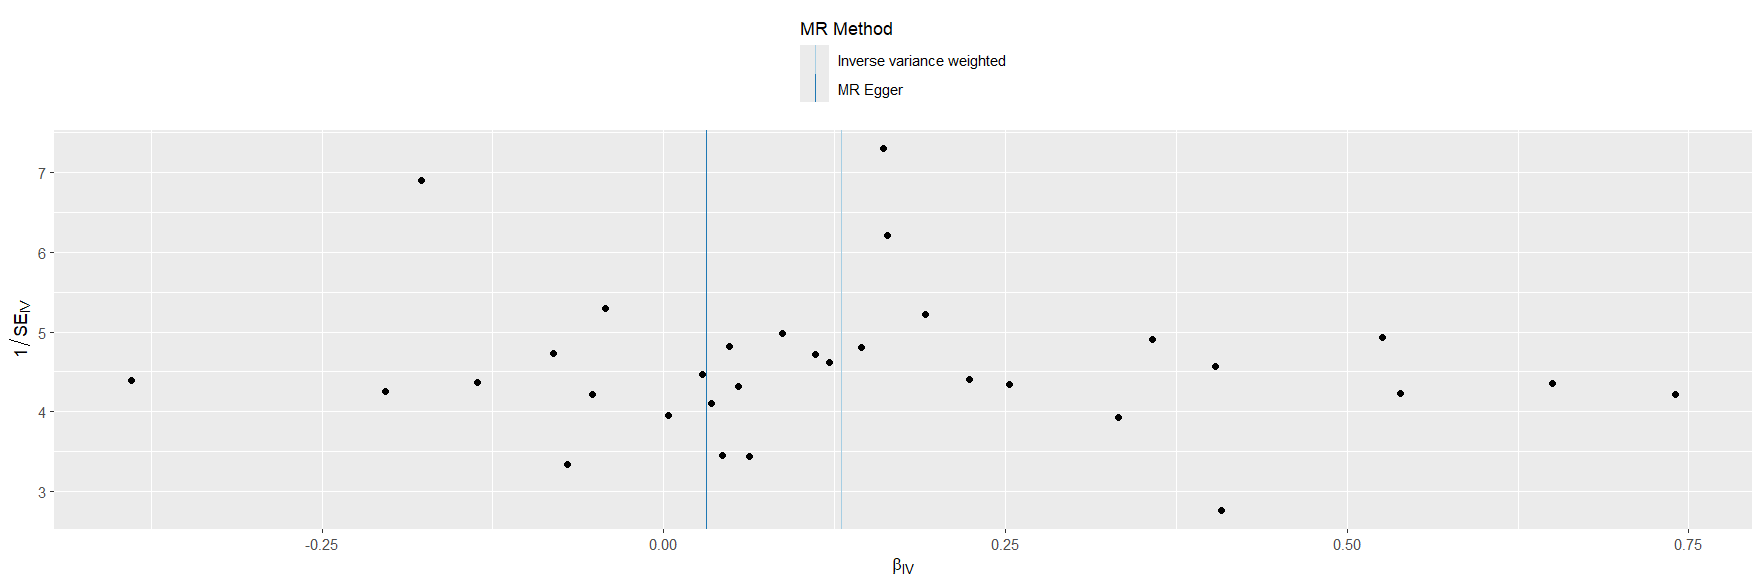


Supplementary Figure 7. The funnel plot of the heterogeneity of migraine on obstructive sleep apnea.


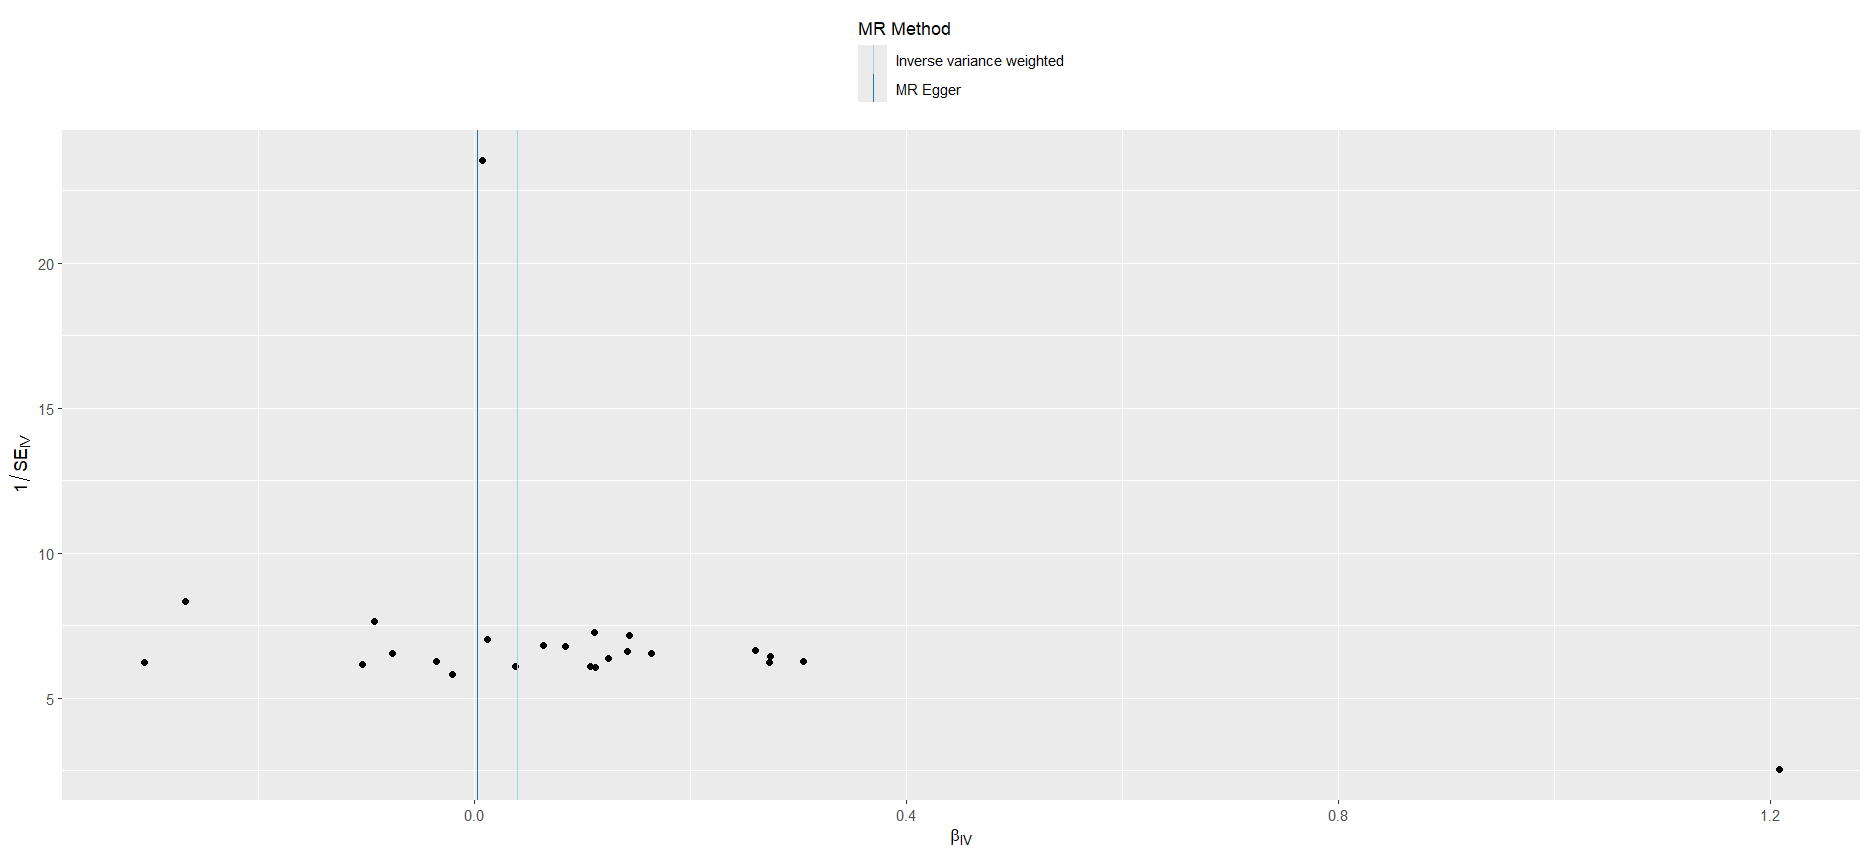


Supplementary Figure 8. The funnel plot of the heterogeneity of migraine with aura on obstructive sleep apnea.


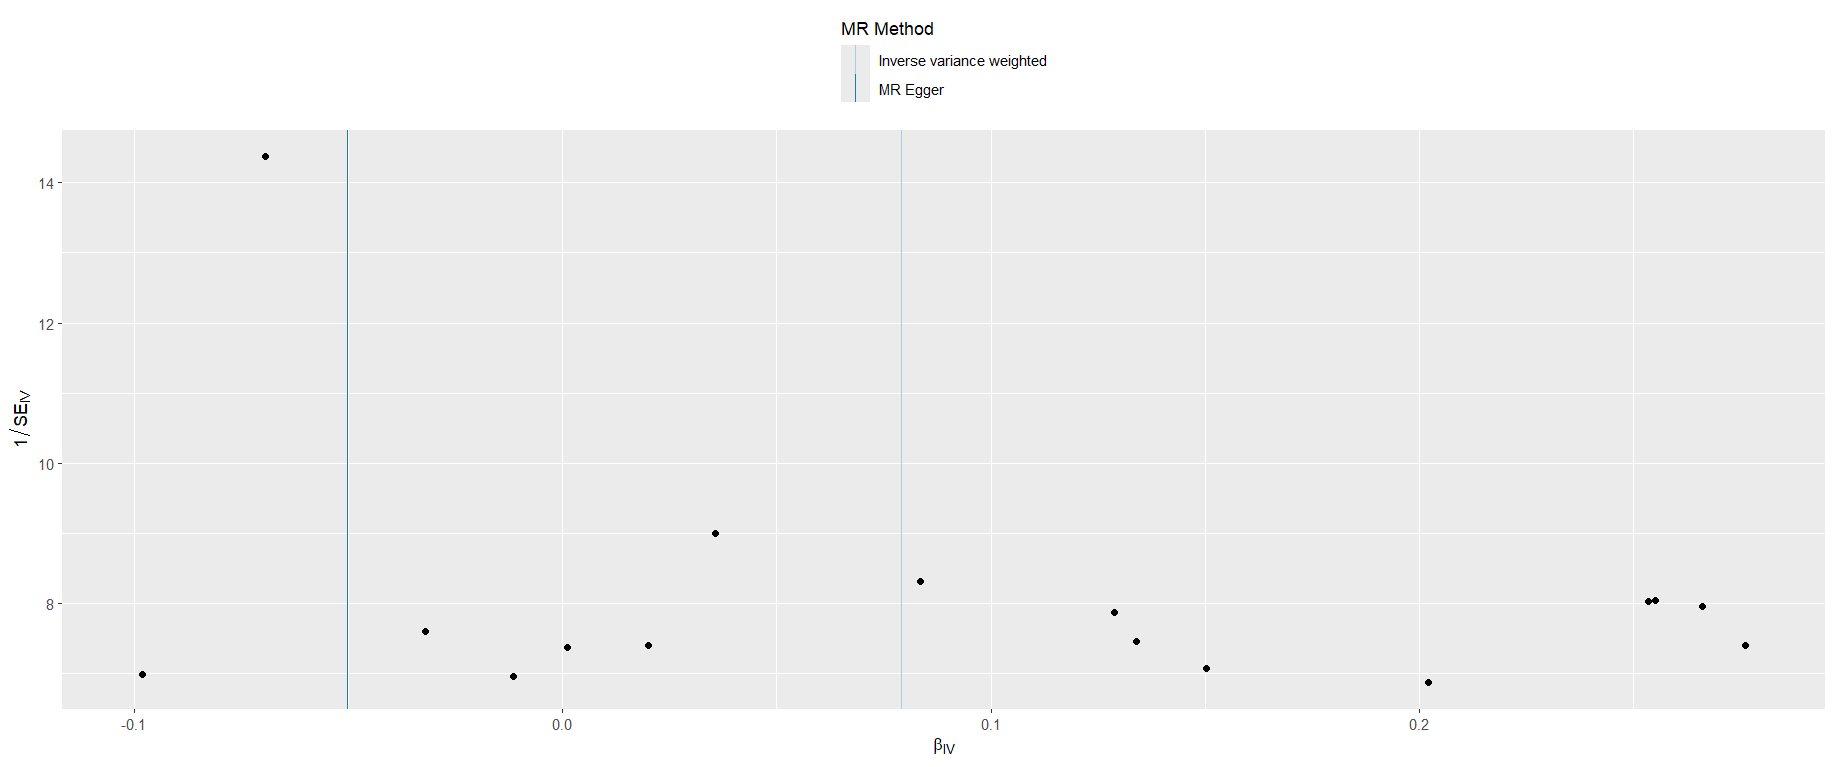


Supplementary Figure 9. The funnel plot of the heterogeneity of migraine without aura on obstructive sleep apnea.


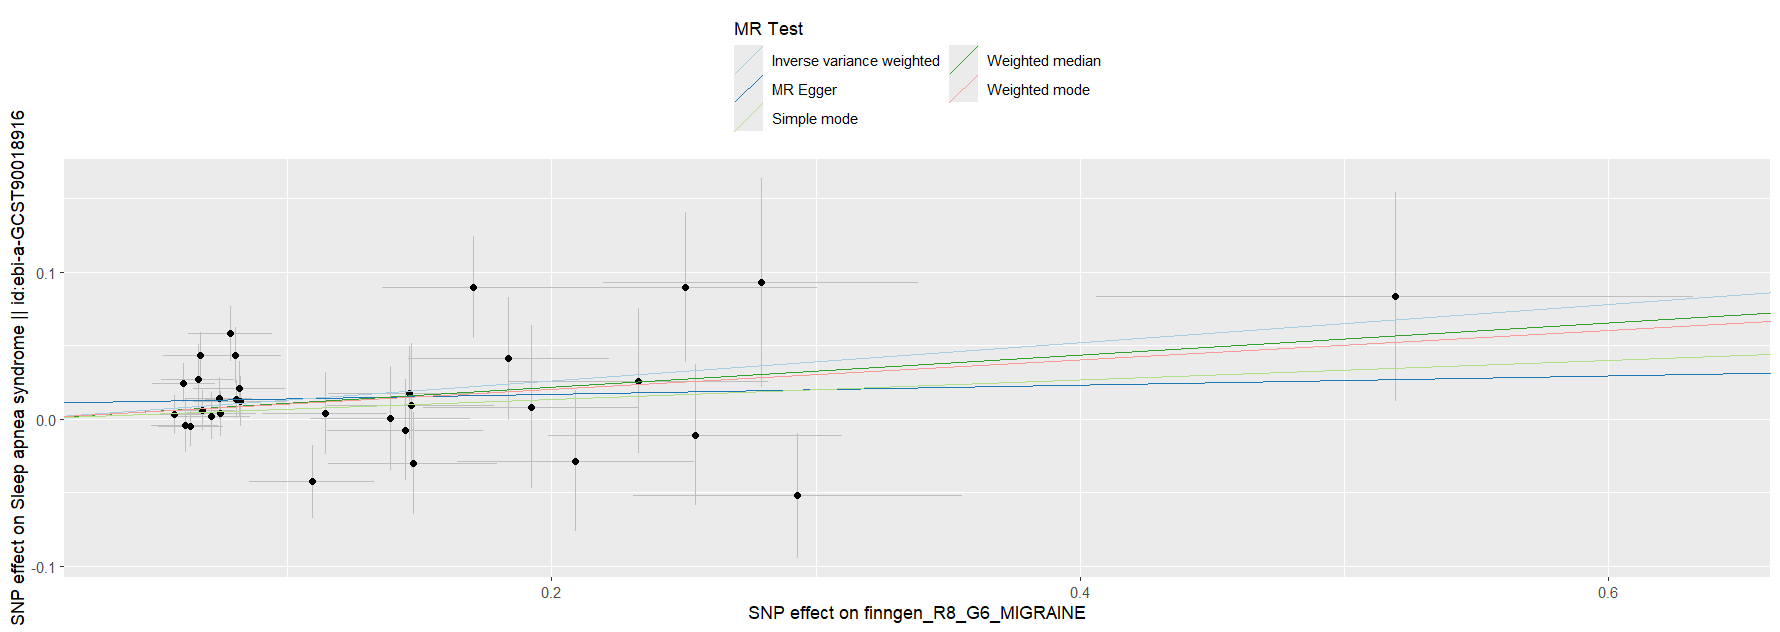


Supplementary Figure 10. The scatter plot of the causal effect of migraine in obstructive sleep apnea.


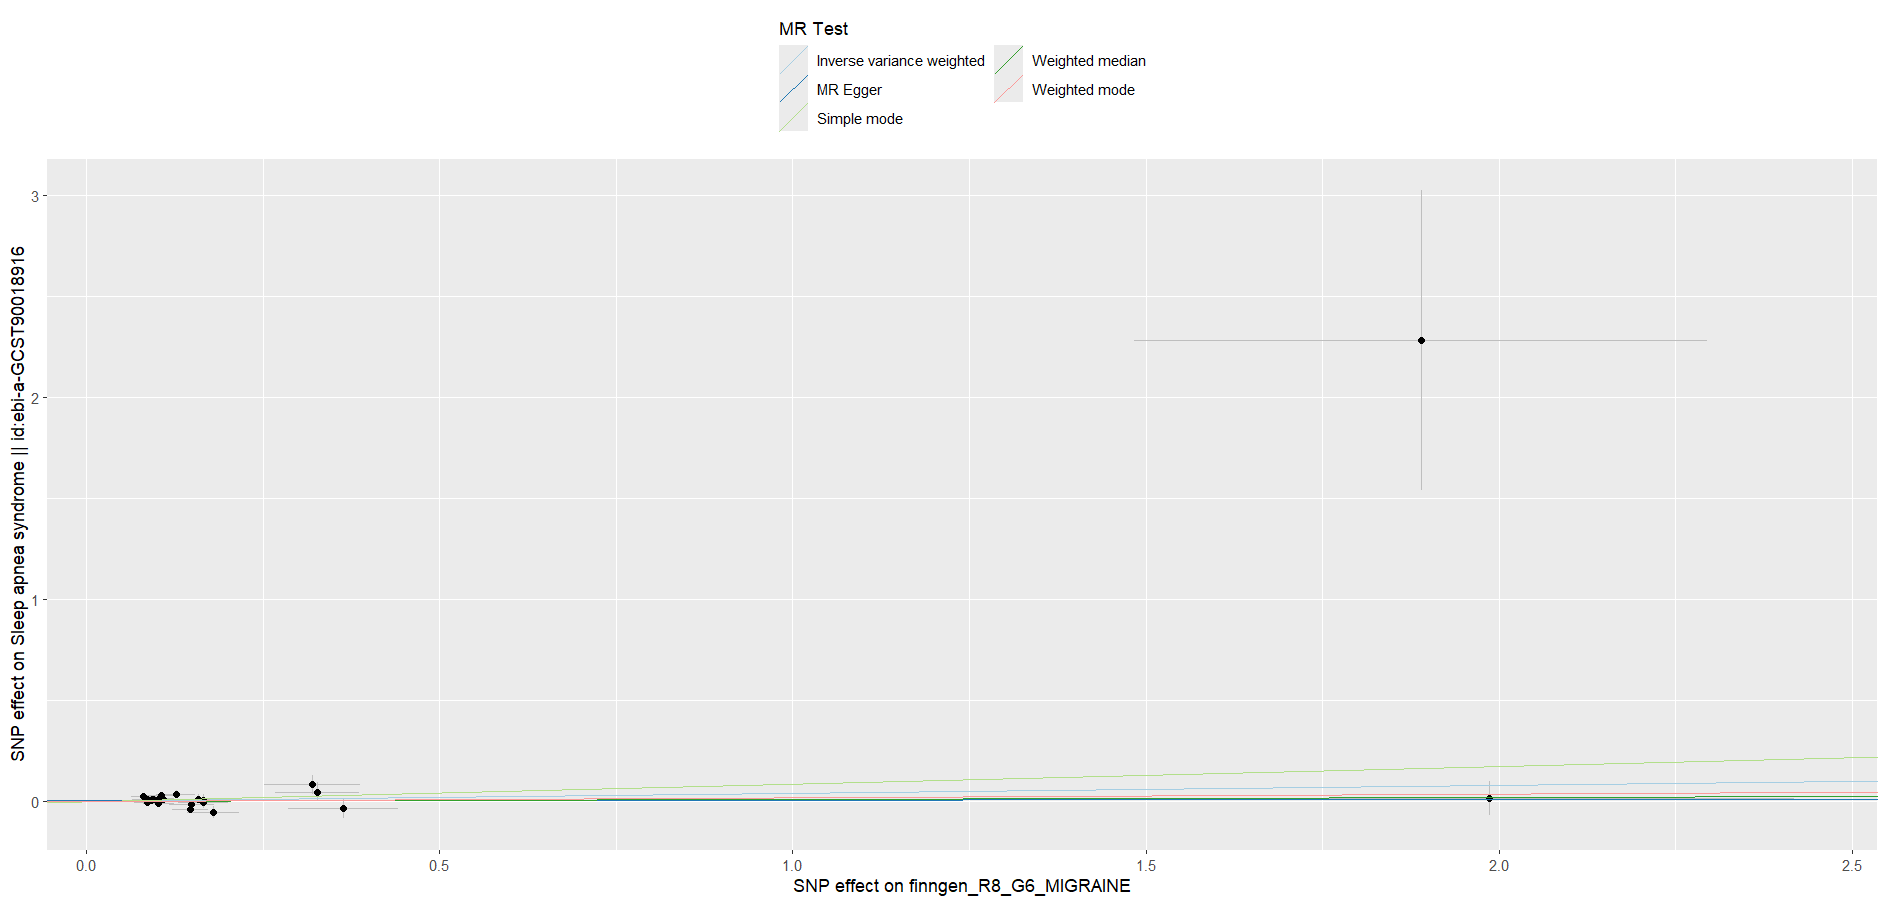


Supplementary Figure 11. The scatter plot of the causal effect of migraine with aura on obstructive sleep apnea.


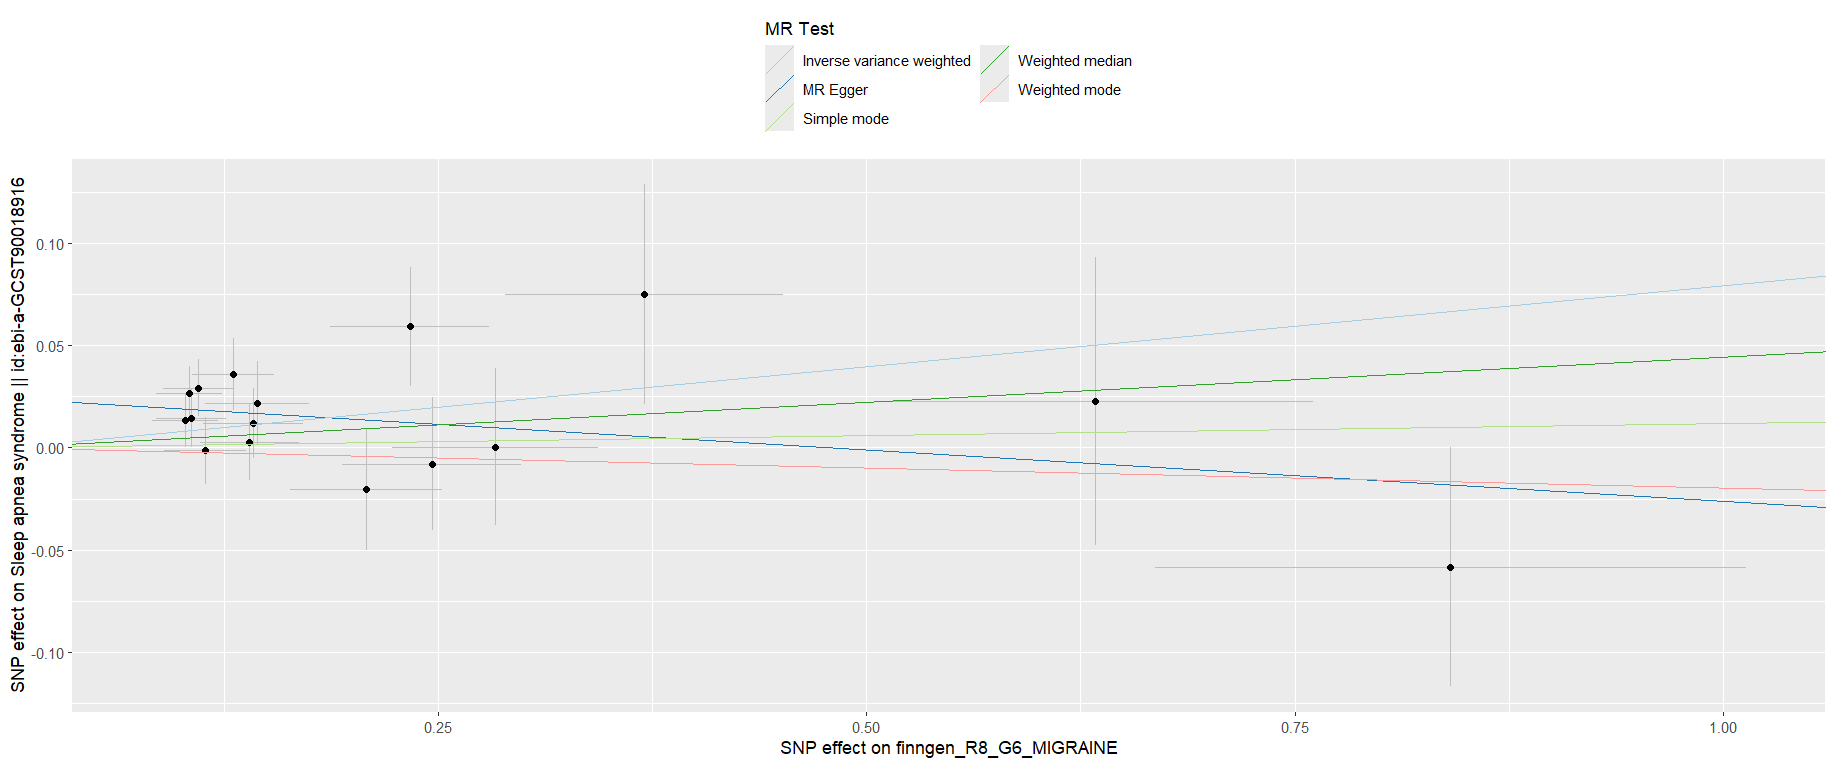


Supplementary Figure 12. The scatter plot of the causal effect of migraine without aura on obstructive sleep apnea.


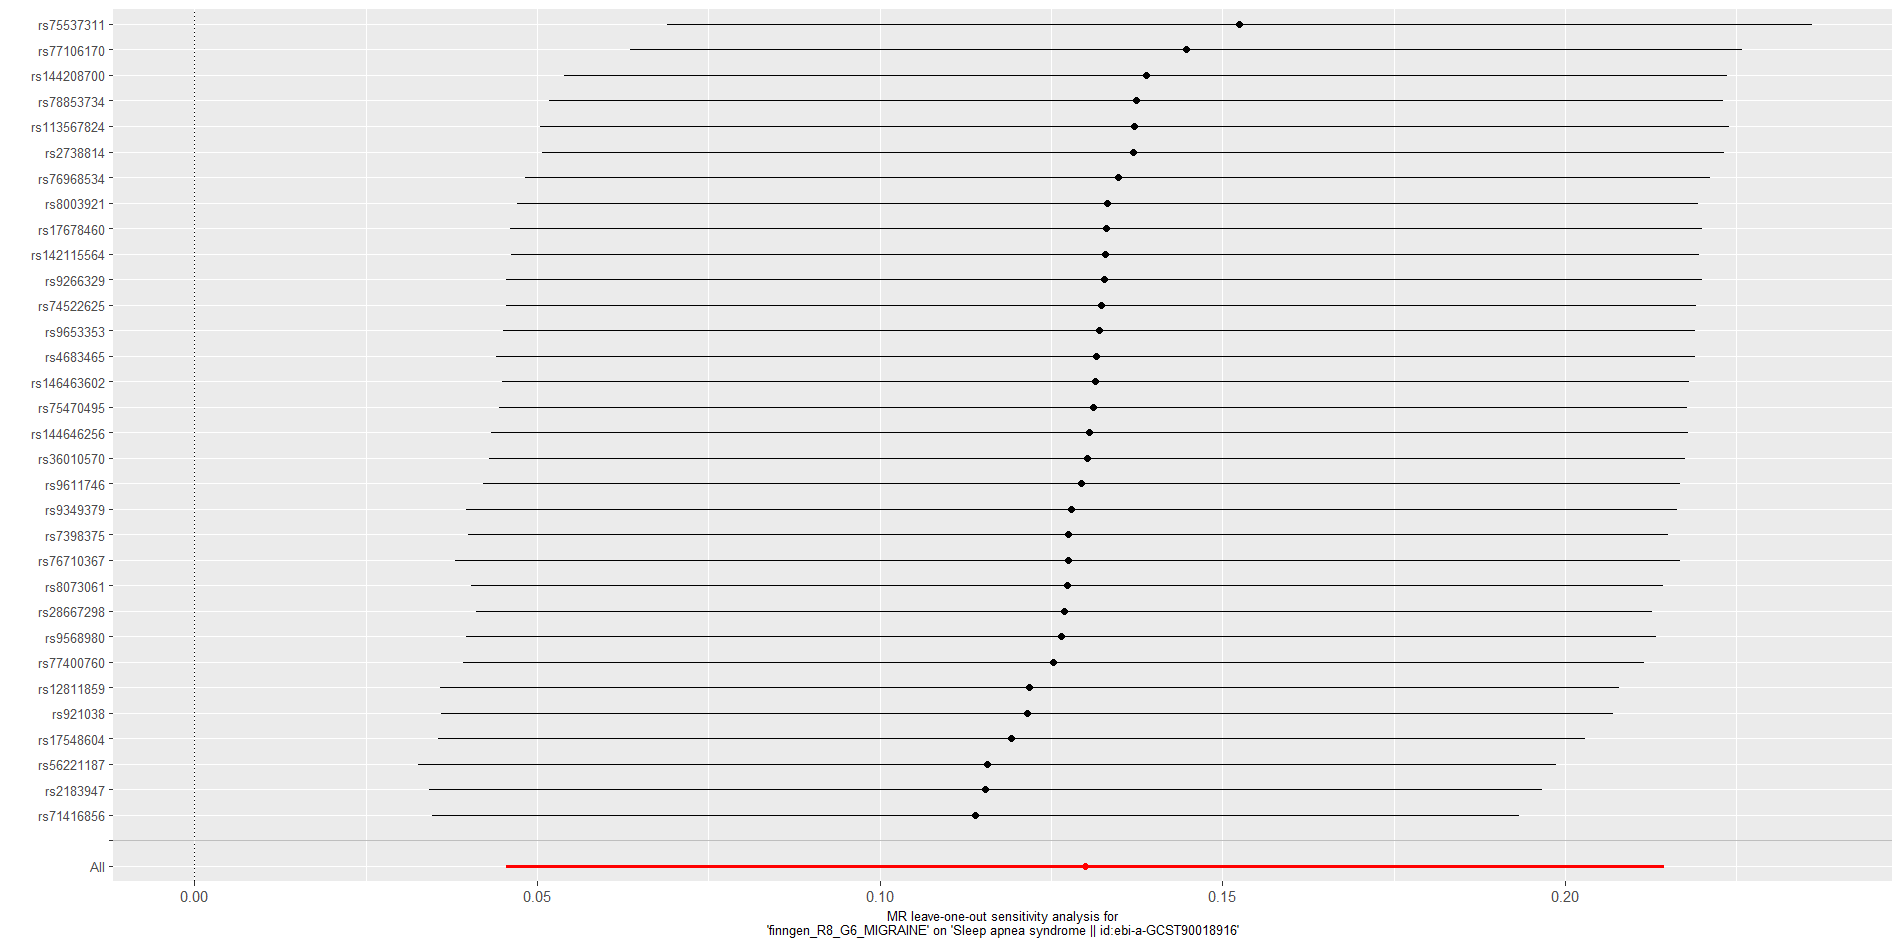


Supplementary Figure 13. The forest plot of the “leave-one-out” sensitivity analysis of the result of migraine on obstructive sleep apnea.


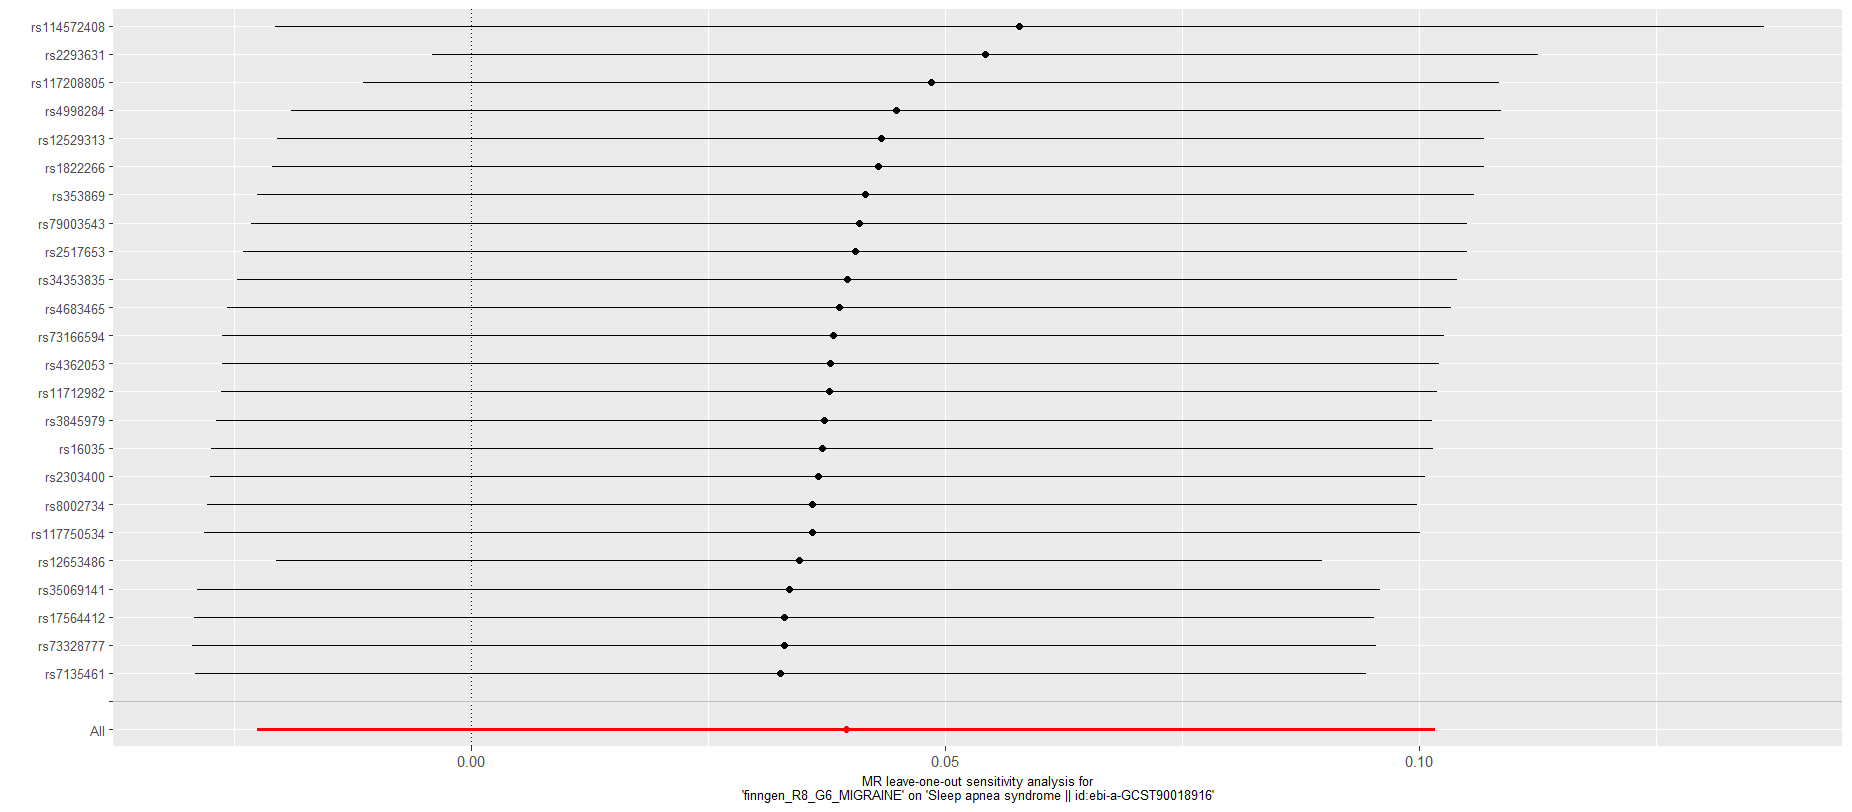


Supplementary Figure 14. The forest plot of the “leave-one-out” sensitivity analysis of the result of migraine with aura on obstructive sleep apnea.


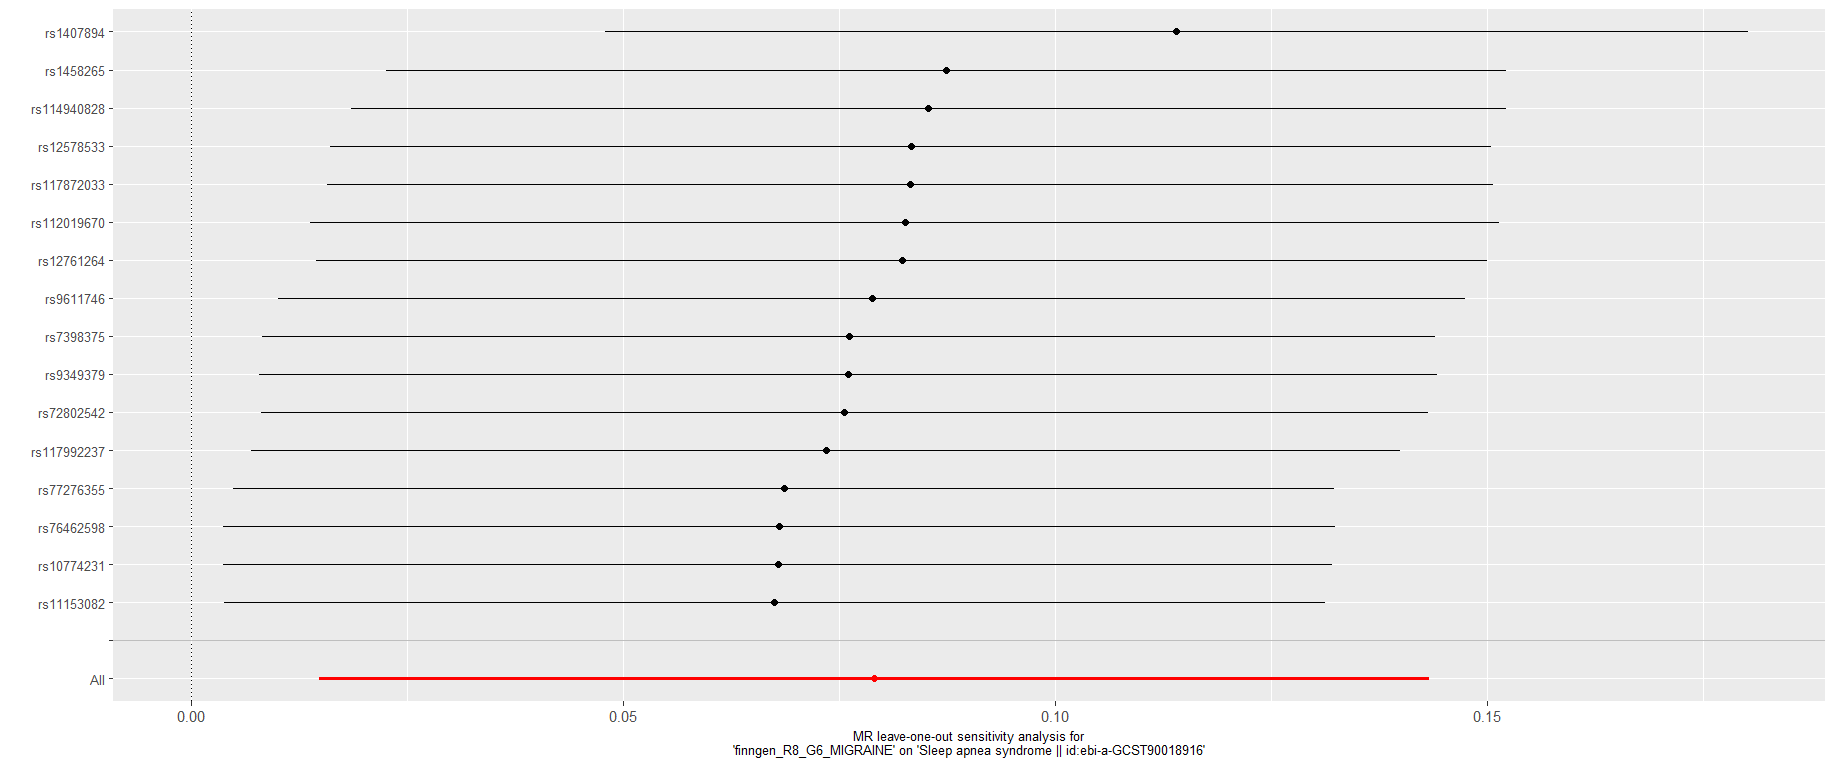


Supplementary Figure 15. The forest plot of the “leave-one-out” sensitivity analysis of the result of migraine without aura on obstructive sleep apnea.
